# Supplementary material for: Support needs of patients with obesity in primary care: a practice-list survey
Source: PubMed Central journal article supplement (PMC5759249; doi:10.1186/s12875-017-0703-4), 2018-01-08
Supplement: 12875_2017_703_MOESM1_ESM.pdf [file 12875_2017_703_MOESM1_ESM.pdf]

# QUESTIONNAIRE PRIVATE & CONFIDENTIAL

---

Thank you for taking the time to fill out this questionnaire

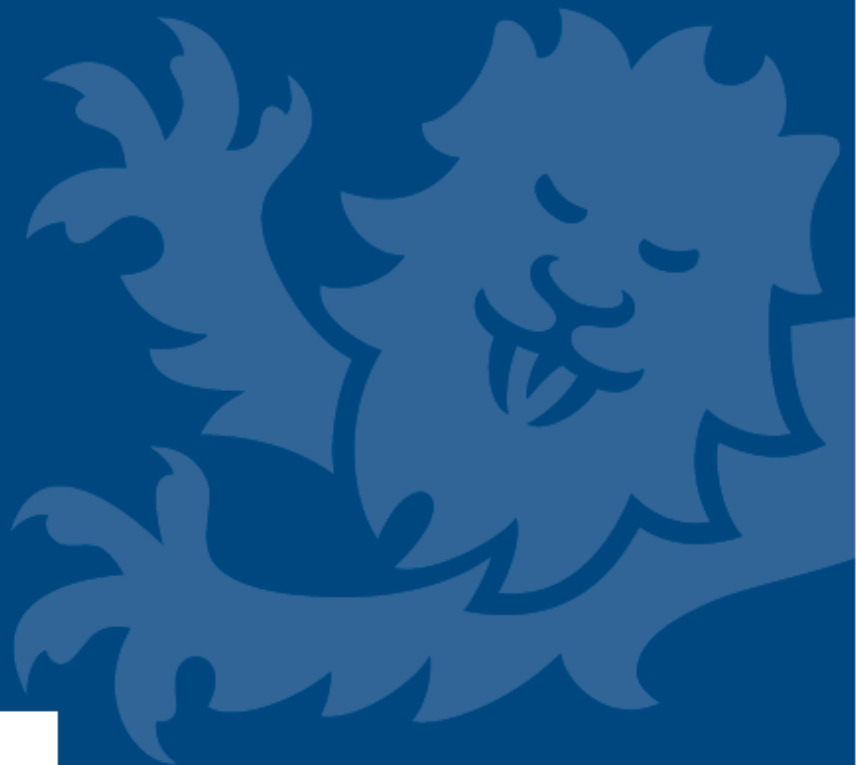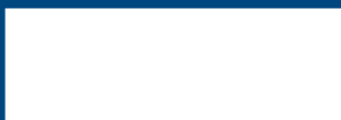

## SECTION A: WEIGHT HISTORY

This section asks about your weight and any weight changes you have experienced.

### A1. What do you currently weigh?

\_\_\_\_\_ stones \_\_\_\_\_ pounds    *OR*    \_\_\_\_\_ kilograms

### A2. How tall are you?

\_\_\_\_\_ feet \_\_\_\_\_ inches    *OR*    \_\_\_\_\_ meters \_\_\_\_\_ centimeters

### A3. What is *the most* you have ever weighed since reaching your current height? (not including pregnancy, if applicable)

\_\_\_\_\_ stones \_\_\_\_\_ pounds    *OR*    \_\_\_\_\_ kilograms

### A4. What is *the least* you have ever weighed since reaching your current height? (excluding any weight loss due to illness)

\_\_\_\_\_ stones \_\_\_\_\_ pounds    *OR*    \_\_\_\_\_ kilograms

\_\_\_\_\_ stones \_\_\_\_\_ pounds    *OR*    \_\_\_\_\_ kilograms

### A5. For how long have you been at your current weight or close to it? (within 4lbs / 2kg)

\_\_\_\_\_ years \_\_\_\_\_ months \_\_\_\_\_ weeks \_\_\_\_\_ days

### A6. Which of these statements best describes your weight over the last 12 months? (Please tick **ONE** only)

My weight has ...

- |                                                |                                           |
|------------------------------------------------|-------------------------------------------|
| <input type="checkbox"/> stayed about the same | <input type="checkbox"/> gone up          |
| <input type="checkbox"/> gone down             | <input type="checkbox"/> gone up and down |

## SECTION B: WEIGHT MANAGEMENT

This section asks about any efforts you have made to lose weight or keep weight off once you've lost it.

### B1. When was the last time that you tried to lose weight? *(Please tick ONE)*

- |                                                                   |                                                                      |
|-------------------------------------------------------------------|----------------------------------------------------------------------|
| <input type="checkbox"/> I am trying to lose weight at the moment | <input type="checkbox"/> In the last 12 months <i>(skip to B2)</i>   |
| <input type="checkbox"/> In the last 3 months <i>(skip to B2)</i> | <input type="checkbox"/> More than 12 months ago <i>(skip to B2)</i> |
| <input type="checkbox"/> In the last 6 months <i>(skip to B2)</i> | <input type="checkbox"/> Never <b>(skip to SECTION C)</b>            |

### B1b. For how long has your current attempt to lose weight lasted so far?

*(Please specify as appropriate)*

\_\_\_\_\_ years \_\_\_\_\_ months \_\_\_\_\_ weeks \_\_\_\_\_ days     n/a

### B2. How many times in your life have you intentionally lost the total amount of weight listed?

*(Please respond to EVERY ITEM).*

- |                          |             |                              |
|--------------------------|-------------|------------------------------|
| 1-4 pounds (0.5-2kg)     | _____ times | <input type="checkbox"/> n/a |
| 5-10 pounds (2-5kg)      | _____ times | <input type="checkbox"/> n/a |
| 11-20 pounds (6-9kg)     | _____ times | <input type="checkbox"/> n/a |
| 21 pounds (10kg) or more | _____ times | <input type="checkbox"/> n/a |

Thinking about your previous weight management efforts *overall* ...

### B3. How successful have you been in your efforts to...

*(Please circle a number on each line)*

- |                         |                              |         |   |   |   |   |                              |  |
|-------------------------|------------------------------|---------|---|---|---|---|------------------------------|--|
|                         | Not successful               | ←—————→ |   |   |   |   | Very successful              |  |
| <b>Lose weight:</b>     | 1                            | 2       | 3 | 4 | 5 | 6 | <input type="checkbox"/> n/a |  |
| <b>Keep weight off:</b> | 1                            | 2       | 3 | 4 | 5 | 6 | <input type="checkbox"/> n/a |  |
|                         | <i>(once you've lost it)</i> |         |   |   |   |   |                              |  |

### B4. How confident are you in your ability to...

*(Please circle a number on each line)*

- |                         |                              |         |   |   |   |   |                              |  |
|-------------------------|------------------------------|---------|---|---|---|---|------------------------------|--|
|                         | Not confident                | ←—————→ |   |   |   |   | Very confident               |  |
| <b>Lose weight:</b>     | 1                            | 2       | 3 | 4 | 5 | 6 | <input type="checkbox"/> n/a |  |
| <b>Keep weight off:</b> | 1                            | 2       | 3 | 4 | 5 | 6 | <input type="checkbox"/> n/a |  |
|                         | <i>(once you've lost it)</i> |         |   |   |   |   |                              |  |

**B5. How *important* is it for you to...**

*(Please circle a number on each line)*

|                                                         | ←—————→       |   |   |   |   |                |                              |
|---------------------------------------------------------|---------------|---|---|---|---|----------------|------------------------------|
|                                                         | Not important |   |   |   |   | Very important |                              |
| <b>Lose weight:</b>                                     | 1             | 2 | 3 | 4 | 5 | 6              | <input type="checkbox"/> n/a |
| <b>Keep weight off:</b><br><i>(once you've lost it)</i> | 1             | 2 | 3 | 4 | 5 | 6              | <input type="checkbox"/> n/a |

**B6. Thinking about your weight management efforts in the last 12 months (including any current attempts), what did you do to manage your weight?**

*(Please tick ALL that apply)*

- Ate smaller portions  n/a
- Set yourself weight management goals
- Switched to food with fewer calories
- Kept a food diary
- Ate more fruit, vegetables and/or salads
- Drank more water
- Changed eating patterns and/or times (e.g. didn't eat late at night)
- Reduced/avoided alcohol
- Reduced/avoided sugary drinks
- Ate less junk food (e.g. takeaways)
- Took up a sport or hobby involving physical activity
- Became more active in everyday life (e.g. walking to work)
- Spent less time sitting down
- Used resources or services provided by your GP practice
- Took non-prescription weight loss pills/supplements (*specify*) \_\_\_\_\_

---

- Bariatric surgery (e.g. gastric band) (*specify*) \_\_\_\_\_
- Joined a weight loss programme (*specify*) \_\_\_\_\_

---

- Used online resources e.g. NHS choices (*specify*) \_\_\_\_\_

---

- Used a phone app (*specify*) \_\_\_\_\_

- 
- Followed a special diet e.g. eliminated food groups (*specify*) \_\_\_\_\_
- 
- Took prescribed weight loss medication (*specify*) \_\_\_\_\_
- 
- Other (*specify*) \_\_\_\_\_
- 

**B7. Thinking about your most recent weight management efforts (including any current efforts) what gets in the way of managing your weight?**  
 (Please tick **ALL** that apply)

- Feeling stressed  n/a
- Feeling tired
- Not having time
- Feeling low
- Feeling demotivated
- Feeling bored of routine
- Feeling like you are 'missing out' (e.g. food you enjoy)
- Having other competing priorities
- Health condition (*specify*) \_\_\_\_\_
- Other (*specify*) \_\_\_\_\_

**B8. Thinking about your most recent weight management efforts (including any current efforts) what motivated you to manage your weight?**  
 (Please tick **ALL** that apply)

- A GP or practice nurse advised me to lose weight  n/a
- I had a health scare (e.g. heart attack, diagnosis)
- A health professional (NOT GP or practice nurse) advised me to lose weight
- I could no longer fit into clothes I wanted to wear
- I was inspired by family/friend(s)/other people who lost weight

- I wanted to lose weight for an event (e.g. wedding, milestone birthday)
  - I wanted to improve my overall health
  - I wanted to improve my physical fitness
  - I wanted to reduce my risk of suffering poor health in the future
  - Family/friends commented on my weight
  - I was unhappy with my general appearance
  - I was unhappy with my body shape and size
  - I reached a life-time high weight
  - Other (please write) \_\_\_\_\_
- 

**B9. In the past 12 months, have you sought help from any of the following people to lose weight?**  
*(Please tick ALL that apply)*

- GP/practice nurse
- Dietician
- Hospital consultant
- Other \_\_\_\_\_
- Exercise specialist/trainer
- Nutritionist
- Commercial weight loss consultant/ trainer
- Psychologist

**B10. How often do you weigh yourself?** *(Please tick ONE)*

- Never
- Once per month or less
- Every couple of weeks
- Once per week
- Several times per week
- Daily
- Other *(please write how often)* \_\_\_\_\_

**B11. Where do you weigh yourself or get weighed?** *(Please tick ALL that apply)*

- I **do not** weigh myself/get weighed
- At home
- At the GP practice/hospital/clinic
- At the gym/exercise class
- At a weight-loss club
- Other *(please write where)* \_\_\_\_\_

**B12. Which kind of scales do you use?** *(Please tick ALL that apply)*

- None
- Dial scale
- Digital scale
- Wifi scale
- Other *(Please write)* \_\_\_\_\_

## SECTION C: PHYSICAL ACTIVITY (IPAQ-SF)

Think about all the **vigorous** activities that you did in the **last 7 days**. **Vigorous** physical activities refer to activities that take hard physical effort and make you breathe much harder than normal. Think *only* about those physical activities that you did for at least 10 minutes at a time.

**C1. During the last 7 days, on how many days did you do vigorous physical activities like heavy lifting, digging, aerobics, or fast bicycling? (Tick ALL that apply)**

\_\_\_\_\_ days per week  No vigorous physical activities (*Skip to C3*)

**C2. How much time did you usually spend doing vigorous physical activities on one of those days?**

\_\_\_\_\_ hours per day \_\_\_\_\_ minutes per day  Don't know/Not sure

Think about all the **moderate** activities that you did in the **last 7 days**. **Moderate** activities refer to activities that take moderate physical effort and make you breathe somewhat harder than normal. Think only about those physical activities that you did for at least 10 minutes at a time.

**C3. During the last 7 days, on how many days did you do moderate physical activities like carrying light loads, bicycling at a regular pace, or doubles tennis? Do not include walking.**

\_\_\_\_\_ days per week  No moderate physical activities (*Skip to C5*)

**C4. How much time did you usually spend doing moderate physical activities on one of those days?**

\_\_\_\_\_ hours per day \_\_\_\_\_ minutes per day  Don't know/Not sure

Think about the time you spent **walking** in the **last 7 days**. This includes at work and at home, walking to travel from place to place, and any other walking that you might do solely for recreation, sport, exercise, or leisure.

**C5. During the last 7 days, on how many days did you walk for at least 10 minutes at a time?**

\_\_\_\_\_ days per week  No walking (*Skip to C7*)

**C6. How much time did you usually spend walking on one of those days?**

\_\_\_\_\_ hours per day \_\_\_\_\_ minutes per day  Don't know/Not sure

The next question is about the time you spent **sitting** on weekdays during the **last 7 days**. Include time spent at work, at home, while doing course work and during leisure time. This may include time spent sitting at a desk, visiting friends, reading, or sitting or lying down to watch television.

**C7. During the last 7 days, how much time did you spend sitting on a week day?**

\_\_\_\_\_ hours per day \_\_\_\_\_ minutes per day  Don't know/Not sure

**SECTION D: ABOUT YOU**

This section asks for some details about you.

**D1. Are you male or female?**  Male  Female  I prefer not to say

**D2. How old were you on your last birthday?** \_\_\_\_\_ years

**D3. What is the full postcode where you currently live?** *(Please write both parts of your postcode in full in the boxes below)*

|  |  |  |  |  |  |  |  |
|--|--|--|--|--|--|--|--|
|  |  |  |  |  |  |  |  |
|--|--|--|--|--|--|--|--|

**D4. Which of the following qualifications do you have?** *(Please tick ALL that apply)*

- 1 or more O levels, CSEs, GCSEs or equivalents
- 1 or more A levels or equivalents
- Vocational qualifications such as NVQ, GNVQ, or City & Guilds
- A degree such as BA or BSc, MA or MSc
- No formal qualifications
- Prefer not to say
- Other *(please write)* \_\_\_\_\_

**D5. What is your current marital status?** *(Please tick ONE)*

- |                                                                |                                    |                                              |
|----------------------------------------------------------------|------------------------------------|----------------------------------------------|
| <input type="checkbox"/> Single                                | <input type="checkbox"/> Separated | <input type="checkbox"/> I prefer not to say |
| <input type="checkbox"/> Cohabiting                            | <input type="checkbox"/> Divorced  |                                              |
| <input type="checkbox"/> Married (including civil partnership) | <input type="checkbox"/> Widowed   |                                              |

**D6. How would you describe your ethnicity?**

\_\_\_\_\_  I prefer not to say



**D7. Do you consider yourself to have any of the following conditions?**

*(Please tick ALL that apply)*

- |                                                         |                                              |
|---------------------------------------------------------|----------------------------------------------|
| <input type="checkbox"/> Diabetes                       | <input type="checkbox"/> Anxiety/depression  |
| <input type="checkbox"/> Pain/discomfort                | <input type="checkbox"/> High blood pressure |
| <input type="checkbox"/> Mobility problems              | <input type="checkbox"/> None                |
| <input type="checkbox"/> Other ( <i>specify</i> ) _____ |                                              |
| <input type="checkbox"/> I prefer not to say            |                                              |

**D8. Do you have any disability or health problem that makes it difficult for you to ...**

*(Please tick ALL that apply)*

- |                                         |                                                 |                                               |
|-----------------------------------------|-------------------------------------------------|-----------------------------------------------|
| <input type="checkbox"/> Go out on foot | <input type="checkbox"/> Get in or out of a car | <input type="checkbox"/> Use public transport |
|-----------------------------------------|-------------------------------------------------|-----------------------------------------------|

**D9. In general, would you say your health is... (*please tick ONE*)**

- |                                              |                                    |                               |                               |                               |
|----------------------------------------------|------------------------------------|-------------------------------|-------------------------------|-------------------------------|
| <input type="checkbox"/> Excellent           | <input type="checkbox"/> Very good | <input type="checkbox"/> Good | <input type="checkbox"/> Fair | <input type="checkbox"/> Poor |
| <input type="checkbox"/> I prefer not to say |                                    |                               |                               |                               |

If you have any additional comments you would like to make, please write them here:

***Thank you very much for completing this questionnaire.***

That is the end of the questionnaire. Please check that you have answered all questions on each page. Please then return the questionnaire in the envelope provided. If you have any questions or concerns about the questionnaire or research, please contact a member of the study team:

Dr Elizabeth Evans  
Phone: 0191 208 5591  
Email: [Elizabeth.evans@newcastle.ac.uk](mailto:Elizabeth.evans@newcastle.ac.uk)

Alex Smith  
Phone: 0191 208 7394  
Email: [Alexandra.smith@newcastle.ac.uk](mailto:Alexandra.smith@newcastle.ac.uk)
